# Supplementary material
Source: PubMed Central journal article supplement (PMC4580967)
Supplement: nn5b02374_si_001.pdf [file nn5b02374_si_001.pdf]

## Supporting Information

# Clotting Mimicry from Robust Hemostatic Bandages Based on Self-Assembling Peptides

Bryan B. Hsu<sup>1,4,5</sup>, William Conway<sup>3</sup>, Cory M. Tschabrunn<sup>6</sup>, Manav Mehta<sup>7</sup>, Monica Perez-Cuevas<sup>8</sup>, Shuguang Zhang<sup>9</sup>, and Paula T. Hammond<sup>2,4,5,\*</sup>

Departments of <sup>1</sup>Chemistry, <sup>2</sup>Chemical Engineering, and <sup>3</sup>Physics  
Massachusetts Institute of Technology  
Cambridge, MA 02139

<sup>4</sup>Koch Institute for Integrative Cancer Research  
Massachusetts Institute of Technology  
Cambridge, MA 02139

<sup>5</sup>Institute for Soldier Nanotechnologies  
Cambridge, MA 02139

<sup>6</sup>Harvard-Thorndike Electrophysiology Institute  
Beth Israel Deaconess Medical Center  
Harvard Medical School, Boston MA 02215

<sup>7</sup>3-D Matrix Medical Technology  
Waltham, MA 02451

<sup>8</sup>Georgia Institute of Technology  
School of Chemical & Biomolecular Engineering  
Atlanta, GA 30332

<sup>9</sup>Center for Bits & Atoms  
Massachusetts Institute of Technology  
Cambridge, MA 02139

\*Corresponding Author

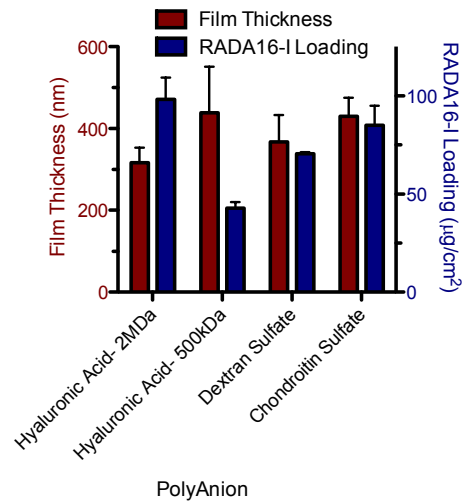

**Figure S1 | Characteristics of different dip-LbL assembled films deposited onto silicon.** Different types of polyanions used in (RADA16-I/polyanion)<sub>40</sub> films results in different RADA16-I loadings and film thicknesses, which can be attributed to their differences in intrinsic chemical characteristics.

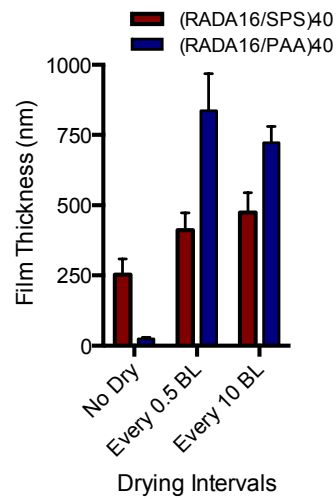

**Figure S2 | Effect of drying intervals during LbL film assembly on film thickness.** Film growth characteristics of dip-LbL assembled (RADA16-I/SPS)<sub>40</sub> (n = 6) and (RADA16-I/PAA)<sub>40</sub> (n = 6) films with intermittent dry steps shows that introduction of a drying step can increase the amount of film deposited.

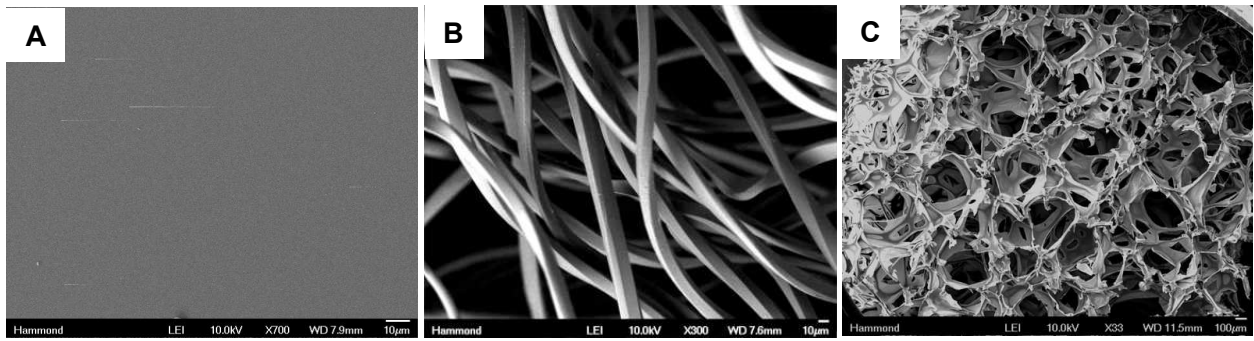

**Figure S3 | Surface morphologies of uncoated substrates.** SEM images of an uncoated glass slide (A), gauze (B), and gelatin sponge (C) revealing relatively smooth surfaces as compared to those coated with LbL films. Higher magnification images can be found in Figure 4. Scale bars represent 10  $\mu\text{m}$  (A-B) and 100  $\mu\text{m}$  (C).

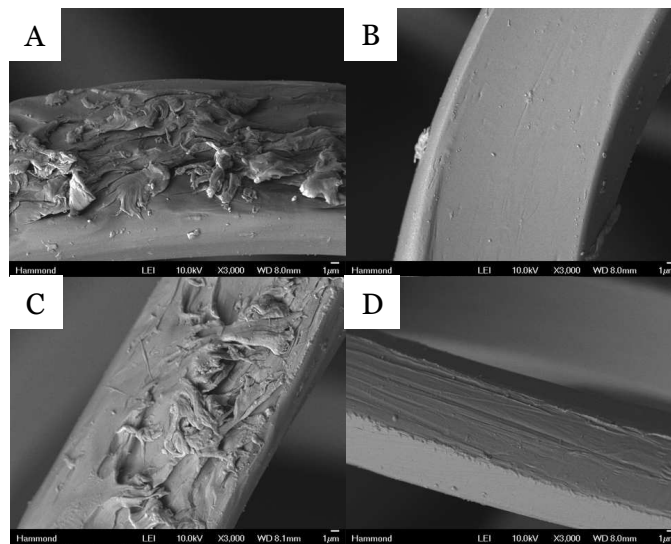

**Figure S4 | Surface morphologies of gauze coated by alternative, non-LbL methods.** SEM images of two representative regions with coating (A,C) and without coating (B,D) of gauze after immersion in a RADA16-I solution (A,B) or spray-LbL coated with (RADA16-I/nothing)<sub>200</sub> films (C,D) show some areas of deposition, but is largely uncoated and inconsistent. Scale bars represent 1  $\mu\text{m}$ .

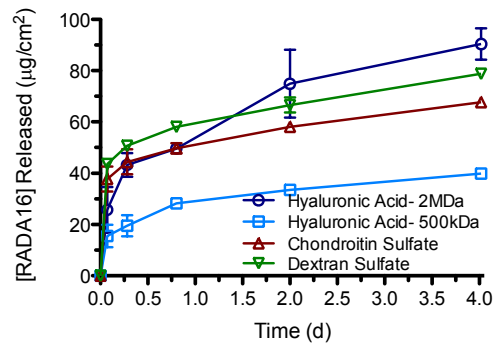

**Figure S5 | Release of RADA16-I from dip-LbL assembled films.** Release profiles of (RADA16-I/polyanion)<sub>40</sub> films incubated in PBS, pH 7.4 at 37°C.

**Table S1 | Scoring criteria for the severity of skin wound puncture bleeding.** Wounds were scored blind to the type of sample applied (i.e., LbL-coated or uncoated gauze).

| Score | Description                                    |
|-------|------------------------------------------------|
| 0     | No bleeding                                    |
| 1     | Very slight bleeding                           |
| 2     | Slow and steady bleeding                       |
| 3     | Moderate bleeding with well defined blood flow |
| 4     | Severe bleeding that flows freely              |
